# Supplementary material
Source: publisher figshare collection journal article supplement (https://tandf.figshare.com/ndownloader/files/21727740)
Supplement: Supplementary file 1 [file 21727740]

Supplemental Table 1. Statistical analyses of the regression lines given in Figure 1. Analyses were performed by GraphPad Prism 6.0.

|  | **Azizi N uptake (mgN)** | **Bidi N uptake (mgN)** | **Khiar N uptake (mgN)** | **Om Rabia N uptake (mgN)** |
| --- | --- | --- | --- | --- |
| **R square** | 0,9315 | 0,5348 | 0,5414 | 0,9959 |
| **Slope** | 0,05310 ± 0,01440 | 0,05294 ± 0,04937 | 0,04258 ± 0,03919 | 0,05259 ± 0,003377 |
| **Y-intercept when X=0.0** | -0,09387 ± 0,2523 | -0,07341 ± 0,8053 | 0,2223 ± 0,7371 | -0,06987 ± 0,06301 |
| **X-intercept when Y=0.0** | 1,768 | 1,387 | -5,221 | 1,329 |
| **Equation** | Y = 0,05310*X - 0,09387 | Y = 0,05294*X - 0,07341 | Y = 0,04258*X + 0,2223 | Y = 0,05259*X - 0,06987 |
|  |  |  |  |  |
|  | **Azizi NUtE (mgDW)** | **Bidi NUtE (mgDW)** | **Khiar NUtE (mgDW)** | **Om Rabia NUtE (mgDW)** |
| **R square** | 0,7426 | 0,3591 | 0,8976 | 0,9844 |
| **Slope** | -0,4025 ± 0,2370 | -0,7976 ± 1,066 | -0,2916 ± 0,09852 | -0,3866 ± 0,04860 |
| **Y-intercept when X=0.0** | 31,33 ± 4,152 | 38,97 ± 17,38 | 29,83 ± 1,853 | 30,20 ± 0,9068 |
| **X-intercept when Y=0.0** | 77,82 | 48,86 | 102,3 | 78,1 |
| **Equation** | Y = -0,4025*X + 31,33 | Y = -0,7976*X + 38,97 | Y = -0,2916*X + 29,83 | Y = -0,3866*X + 30,20 |
|  |  |  |  |  |
|  | **Azizi N uptake (mgN)** | **Bidi N uptake (mgN)** | **Khiar N uptake (mgN)** | **Om Rabia N uptake (mgN)** |
| **R square** | 0,9315 | 0,5348 | 0,5414 | 0,9959 |
| **Slope** | 0,05310 ± 0,01440 | 0,05294 ± 0,04937 | 0,04258 ± 0,03919 | 0,05259 ± 0,003377 |
| **Y-intercept when X=0.0** | -0,09387 ± 0,2523 | -0,07341 ± 0,8053 | 0,2223 ± 0,7371 | -0,06987 ± 0,06301 |
| **X-intercept when Y=0.0** | 1,768 | 1,387 | -5,221 | 1,329 |
| **Equation** | Y = 0,05310*X - 0,09387 | Y = 0,05294*X - 0,07341 | Y = 0,04258*X + 0,2223 | Y = 0,05259*X - 0,06987 |
|  |  |  |  |  |
|  | **Azizi NUtE (mgDW)** | **Bidi NUtE (mgDW)** | **Khiar NUtE (mgDW)** | **Om Rabia NUtE (mgDW)** |
| **R square** | 0,7426 | 0,3591 | 0,8976 | 0,9844 |
| **Slope** | -0,4025 ± 0,2370 | -0,7976 ± 1,066 | -0,2916 ± 0,09852 | -0,3866 ± 0,04860 |
| **Y-intercept when X=0.0** | 31,33 ± 4,152 | 38,97 ± 17,38 | 29,83 ± 1,853 | 30,20 ± 0,9068 |
| **X-intercept when Y=0.0** | 77,82 | 48,86 | 102,3 | 78,1 |
| **Equation** | Y = -0,4025*X + 31,33 | Y = -0,7976*X + 38,97 | Y = -0,2916*X + 29,83 | Y = -0,3866*X + 30,20 |
|  |  |  |  |  |
